# Supplementary material
Source: publisher site journal article supplement (https://www.spandidos-publications.com/80/downloadSupplementary)

Figure S1. Trp<sup>150</sup> and Trp<sup>153</sup> of Rspo2 are C-mannosylated in A549 cells. MS/MS spectra of the double-charged un-, mono-, and di-mannosylated <sup>146</sup>EVGHWSEWGTC SR<sup>158</sup> peptides ( $m/z$ =796.33, 877.36 and 958.39, respectively). The indicated y-ions were detected as single-charged ions. Un-mannosylated- (top), only Trp<sup>150</sup>-mannosylated- (middle), and both Trp<sup>150</sup>- and Trp<sup>153</sup>-mannosylated- (bottom) peptides were observed. Trp, tryptophan; Rspo2, Rspo2, R-spondin2; MS/MS, tandem mass spectroscopy.

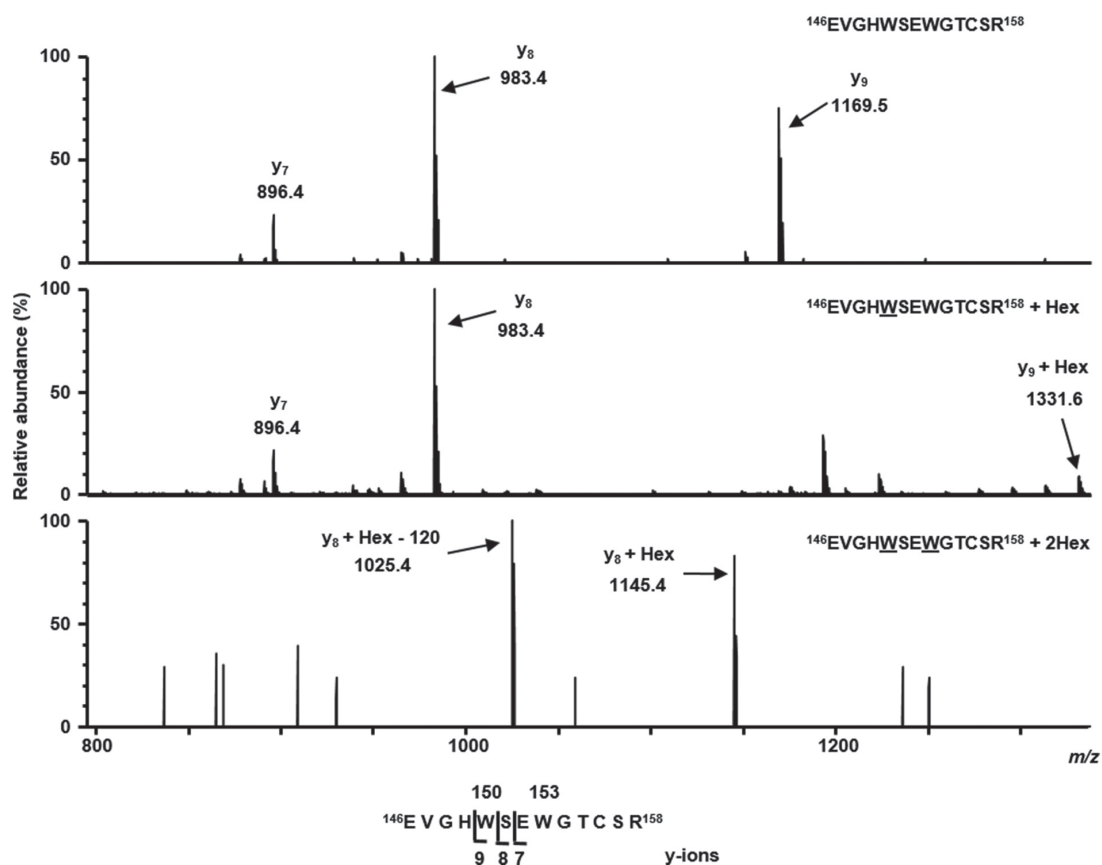

Figure S2. Effect of C-mannosylation at Trp<sup>150</sup> on the agonistic activity of Rspo2. Parental HT1080 cells were transfected with pCI-neo, Rspo2/wt-MH, Rspo2/2WA-MH and Rspo2/W150A-MH. At 72 h post-transfection, cells were selected with 400  $\mu$ g/ml G418 for 10 days. Each cell line was transfected with TOPFlash or FOPFlash in the presence of 30% L-Wnt3a cell-conditioned medium. After 24 h, luciferase activities were measured and normalized to *Renilla* luciferase. \*P<0.05 compared with neo; #P<0.05 compared with wt. Trp, tryptophan; Rspo2, R-spondin2; wt, wild-type; ns, not significant.

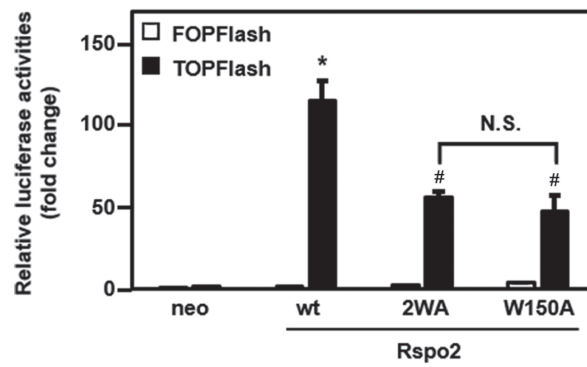

Supplement: Supplementary file 1 [file downloadSupplementary]
